# Supplementary material
Source: Research Square preprint supplement (doi:10.21203/rs.3.rs-9982577/v1)
Supplement: Supplementary file 4 [file ae1b91b4044548c4c2ea4453.xlsx]

## Sheet: Legend
This table displays the main features of the 108 Ribo-seq experiments analyzed in the manuscript
Column title	Description
Study name	Primary author and publication year of the reanalysed dataset
Species	Species of the sample
Study_accession	GEO or SRA data repositories accession
Project_link	Link where the dataset can be accessed
PMID	PMID of the published dataset
Riboseq inibitor used	Type of ribosomal inhibitor used
Sample_accessions	Sample accessions included in the analysis pipeline
Sample Biological type	Biological provenance of the Riboseq sample data

## Sheet: Supplementary Table 1
Study name	Species	Study_accession	Project_link	PMID	Riboseq inibitor used	Sample_accessions	Sample Biological type
Campos_2020	HS	GSE133111	https://www.ncbi.nlm.nih.gov/geo/query/acc.cgi?acc=GSE133111		cycloheximide	GSM3900208; GSM3900209; GSM3900210; GSM3900211; GSM3900212; GSM3900213	Cells_A549
Stumpf_2013	HS	SRA099816	https://www.ncbi.nlm.nih.gov/geo/query/acc.cgi?acc=GSE254254	38917323	cycloheximide	GSM8036810; GSM8036809; GSM8036808; GSM8036807; GSM8036806; GSM8036805	Cells_A549
Wang S	HS	GSE252920	https://www.ncbi.nlm.nih.gov/geo/query/acc.cgi?acc=GSE252920	39137200	cycloheximide	GSM8010380; GSM8010379; GSM8010378; GSM8010377; GSM8010376; GSM8010375	Cells_A549
Rooijers_2013	HS	GSE48933	https://www.ncbi.nlm.nih.gov/geo/query/acc.cgi?acc=GSE48933	24301020	chloramphenicol	GSM1187134; GSM1187135	Cells_BJ
Loayza-Puch_2013	HS	GSE45833	https://www.ncbi.nlm.nih.gov/geo/query/acc.cgi?acc=GSE45833	23594524	cycloheximide	GSM1047584; GSM1047585; GSM1047586; GSM1047587; GSM1047588; GSM1047589; GSM1047590; GSM1047591; GSM1115204; GSM1115207; GSM1115210; GSM1115213; GSM1115216	Cells_BJ
Rooijers_2013	HS	GSE48933	https://www.ncbi.nlm.nih.gov/geo/query/acc.cgi?acc=GSE48933	24301020	chloramphenicol	GSM1187138; GSM1187140; GSM1187139; GSM1187141	Cells_Cybrid
Xu_2016	HS	GSE64962	https://www.ncbi.nlm.nih.gov/geo/query/acc.cgi?acc=GSE64962	26729373	cycloheximide	GSM1585210; GSM1585211; GSM1585212; GSM1585213; GSM1585222; GSM1585223; GSM1585224; GSM1585225; GSM1585226; GSM1585227; GSM1585228; GSM1585229; GSM1585238; GSM1585239; GSM1585240; GSM1585241; GSM1585242; GSM1585243; GSM1585244; GSM1585245	Cells_Fibroblasts
Oconnell_2019	HS	GSE123564	https://www.ncbi.nlm.nih.gov/geo/query/acc.cgi?acc=GSE123564	30707697	cycloheximide	GSM3507221; GSM3507222; GSM3507223; GSM3507224; GSM3507225; GSM3507226; GSM3507227; GSM3507228; GSM3507229; GSM3507230	Cells_Fibroblasts
Chothani_2019	HS	GSE131112	https://www.ncbi.nlm.nih.gov/geo/query/acc.cgi?acc=GSE131112	31284728	cycloheximide	GSM3490775; GSM3490776; GSM3490777; GSM3490778; GSM3490779; GSM3490780; GSM3490781; GSM3490782; GSM3490784; GSM3490785; GSM3490786; GSM3490787; GSM3490788; GSM3490789; GSM3490790; GSM3490791; GSM3490792; GSM3490793; GSM3490794	Cells_Fibroblasts
Jakobsson_2017	HS	GSE97140	https://www.ncbi.nlm.nih.gov/geo/query/acc.cgi?acc=GSE97140	28520920	cycloheximide	GSM2552191; GSM2552192; GSM2552193; GSM2552194; GSM2552195	Cells_HAP-1
Han_2020	HS	GSE136664	https://www.ncbi.nlm.nih.gov/geo/query/acc.cgi?acc=GSE136664	32064749	cycloheximide	GSM4054749; GSM4054750; GSM4054751	Cells_HCT116
Roshan P	HS	GSE272515	https://www.ncbi.nlm.nih.gov/geo/query/acc.cgi?acc=GSE272515	39727167	cycloheximide	GSM8403804; GSM8403803; GSM8403802; GSM8403801; GSM8403800	Cells_HCT116
Oh_2016	HS	GSE70802	https://www.ncbi.nlm.nih.gov/geo/query/acc.cgi?acc=GSE70802	27058758	cycloheximide	GSM1819217; GSM1819218; GSM1819219; GSM1819220; GSM1819221; GSM1819222; GSM1819223; GSM1819224; GSM1819225; GSM1819226; GSM1819227; GSM1819228	Cells_HEK293T
Ingolia_2012	HS	GSE37744	https://www.ncbi.nlm.nih.gov/geo/query/acc.cgi?acc=GSE37744	22836135	cycloheximide	GSM926674; GSM926675; GSM926676	Cells_HEK293T
Andreev_2015	HS	GSE55195	https://www.ncbi.nlm.nih.gov/geo/query/acc.cgi?acc=GSE55195	25621764	cycloheximide	GSM1331342; GSM1331344; GSM1331346; GSM1331348	Cells_HEK293T
Martinez_2019	HS	GSE125218	https://www.ncbi.nlm.nih.gov/geo/query/acc.cgi?acc=GSE125218	31819274	cycloheximide	GSM3566397; GSM3566398; GSM3566399; GSM3566400; GSM3566401; GSM3566402; GSM3566403; GSM3566404; GSM3566405	Cells_HEK293T
Martinez_2019	HS	GSE125218	https://www.ncbi.nlm.nih.gov/geo/query/acc.cgi?acc=GSE125218	31819274	lactimidomycin	GSM3566414; GSM3566415	Cells_HEK293T
Iwasaki_2016	HS	GSE70211	https://www.ncbi.nlm.nih.gov/geo/query/acc.cgi?acc=GSE70211	27309803	cycloheximide	GSM1720803; GSM1720804; GSM1720805; GSM1720806; GSM1720807; GSM1720813; GSM1720814; GSM1720815; GSM1720816; GSM1720817	Cells_HEK293T
Malecki_2017	HS	GSE93133	https://www.ncbi.nlm.nih.gov/geo/query/acc.cgi?acc=GSE93133	28108655	cycloheximide	GSM2445294; GSM2445295; GSM2445296; GSM2445297	Cells_HEK293T
Zhang_2017	HS	GSE94460	https://www.ncbi.nlm.nih.gov/geo/query/acc.cgi?acc=GSE94460	29170441	cycloheximide	GSM2476121; GSM2476122	Cells_HEK293T
Park_2017	HS	GSE97384	https://www.ncbi.nlm.nih.gov/geo/query/acc.cgi?acc=GSE97384	28494858	na	GSM2563629; GSM2563630; GSM2563631; GSM2563632	Cells_HEK293T
Sauer_2019	HS	GSE105172	https://www.ncbi.nlm.nih.gov/geo/query/acc.cgi?acc=GSE105172	31160600	cycloheximide	GSM2824214; GSM2824215; GSM2824216; GSM2824217; GSM2824218; GSM2824219	Cells_HEK293T
Woo_2018	HS	GSE103719	https://www.ncbi.nlm.nih.gov/geo/query/acc.cgi?acc=GSE103719	30257221	cycloheximide	GSM2779669; GSM2779670; GSM2779671; GSM2779672; GSM2779673; GSM2779674; GSM2779675; GSM2779676	Cells_HEK293T
Clamer_2018	HS	GSE112353	https://www.ncbi.nlm.nih.gov/geo/query/acc.cgi?acc=GSE112353	30355487	cycloheximide	GSM3068264; GSM3068265; GSM3068266; GSM3068267	Cells_HEK293T
Groenke_2020	HS	GSE134752	https://www.ncbi.nlm.nih.gov/geo/query/acc.cgi?acc=GSE134752		cycloheximide	GSM3966949; GSM3966950; GSM3966951; GSM3966952; GSM3966953; GSM3966954	Cells_HEK293T
Lee_2012	HS	SRA056377	https://www.ncbi.nlm.nih.gov/sra/?term=SRA056377	22927429	cycloheximide	SRX172361; SRX172315	Cells_HEK293T
Lee_2012	HS	SRA056377	https://www.ncbi.nlm.nih.gov/sra/?term=SRA056377	22927429	lactimidomycin	SRX172360; SRX172392	Cells_HEK293T
Liu_2013	HS	SRA061778	https://www.ncbi.nlm.nih.gov/sra/?term=SRA061778	23290916	cycloheximide	SRX205671; SRX205670; SRX205669; SRX205668; SRX205667; SRX205666; SRX205665; SRX205664; SRX205663; SRX205662; SRX205661; SRX205658	Cells_HEK293T
Gao_2014	HS	SRA160745	https://www.ncbi.nlm.nih.gov/sra/?term=SRA160745	25486063	lactimidomycin	SRX740747; SRX740746; SRX740745	Cells_HEK293T
Gao_2014	HS	SRA160745	https://www.ncbi.nlm.nih.gov/sra/?term=SRA160745	25486063	cycloheximide	SRX740750; SRX740749; SRX740748	Cells_HEK293T
Eichhorn_2014	HS	GSE60426	https://www.ncbi.nlm.nih.gov/geo/query/acc.cgi?acc=GSE60426	25263593	cycloheximide	GSM1479598; GSM1479600	Cells_HEK293T
Jan_2014	HS	GSE61012	https://www.ncbi.nlm.nih.gov/geo/query/acc.cgi?acc=GSE61012	25378630	cycloheximide	GSM1495535; GSM1495536	Cells_HEK293T
Song_2020	HS	GSE124558	https://www.ncbi.nlm.nih.gov/geo/query/acc.cgi?acc=GSE124558	31819270	cycloheximide	GSM3984243; GSM3984247; GSM3984253; GSM3984255; GSM3984257; GSM3984245; GSM3984249; GSM3984251	Cells_HEK293T
Lyabin_2020	HS	GSE130781	https://www.ncbi.nlm.nih.gov/geo/query/acc.cgi?acc=GSE130781		cycloheximide	GSM3753501; GSM3753502; GSM3753503; GSM3753506; GSM3753507; GSM3753510; GSM3753511; GSM3753514; GSM3753515; GSM3753516; GSM3753519; GSM3753520	Cells_HEK293T
Chang_2019	HS	GSE132725	https://www.ncbi.nlm.nih.gov/geo/query/acc.cgi?acc=GSE132725	31340047	cycloheximide	GSM3890768; GSM3890769; GSM3890770; GSM3890771	Cells_HEK293T
Guo_2010	HS	GSE22004	https://www.ncbi.nlm.nih.gov/geo/query/acc.cgi?acc=GSE22004	20703300	cycloheximide	GSM546920; GSM546922; GSM546924; GSM546926; GSM546928; GSM546930	Cells_HeLa
Wang_2014	HS	GSE49339	https://www.ncbi.nlm.nih.gov/geo/query/acc.cgi?acc=GSE49339	23453015	cycloheximide	GSM1197612; GSM1197614; GSM1197618; GSM1197621	Cells_HeLa
Yoon_2014	HS	GSE52976	https://www.ncbi.nlm.nih.gov/geo/query/acc.cgi?acc=GSE52976	25366541	na	GSM1279707; GSM1279708; GSM1279709	Cells_HeLa
Wang_2015	HS	GSE63591	https://www.ncbi.nlm.nih.gov/sra/?term=SRA099816	26046440	cycloheximide	GSM1553248; GSM1553250; GSM1553252; GSM1553254; GSM1717890; GSM1717892	Cells_HeLa
Zur_2016	HS	GSE73565	https://www.ncbi.nlm.nih.gov/geo/query/acc.cgi?acc=GSE73565	26898226	cycloheximide	GSM1898010; GSM1898011; GSM1898012; GSM1898013; GSM1898018; GSM1898019; GSM1898020; GSM1898021	Cells_HeLa
Shi_2017	HS	GSE86214	https://www.ncbi.nlm.nih.gov/geo/query/acc.cgi?acc=GSE86214	28106072	cycloheximide	GSM2424851; GSM2424853; GSM2424855	Cells_HeLa
Park_2016	HS	GSE79664	https://www.ncbi.nlm.nih.gov/geo/query/acc.cgi?acc=GSE79664	27153541	cycloheximide	GSM2100596; GSM2100597; GSM2100598; GSM2100599; GSM2100600; GSM2100601; GSM2100602	Cells_HeLa
Arango_2018	HS	GSE102113	https://www.ncbi.nlm.nih.gov/geo/query/acc.cgi?acc=GSE102113	30449621	cycloheximide	GSM2724036; GSM2724037; GSM2724038; GSM2724039	Cells_HeLa
Murat_2018	HS	GSE105082	https://www.ncbi.nlm.nih.gov/geo/query/acc.cgi?acc=GSE105082	30591072	cycloheximide	GSM2817679; GSM2817680; GSM2817681; GSM2817682; GSM2817683; GSM2817684; GSM2817685; GSM2817686; GSM2817687; GSM2817688; GSM2817689	Cells_HeLa
Zhang_2018	HS	GSE115146	https://www.ncbi.nlm.nih.gov/geo/query/acc.cgi?acc=GSE115146	30297778	na	GSM3168232; GSM3168233; GSM3168234; GSM3168235; GSM3168236; GSM3168237	Cells_HeLa
Zhang_2019	HS	GSE112276	https://www.ncbi.nlm.nih.gov/geo/query/acc.cgi?acc=GSE112276	31031084	cycloheximide	GSM3069552; GSM3069553; GSM3069554; GSM3069555	Cells_HeLa
Avolio_2018	HS	GSE118050	https://www.ncbi.nlm.nih.gov/geo/query/acc.cgi?acc=GSE118050	30260431	cycloheximide	GSM3316956; GSM3316957; GSM3316958; GSM3316959; GSM3316960; GSM3316961	Cells_HeLa
Stadler_2011	HS	SRA049309	https://www.ncbi.nlm.nih.gov/sra/?term=SRA049309	22045228	na	SRX118148; SRX118147	Cells_HeLa
Stadler_2011	HS	SRA049309	https://www.ncbi.nlm.nih.gov/sra/?term=SRA049309	22045228	cycloheximide	SRX118146; SRX118145	Cells_HeLa
Martinez_2019	HS	GSE125218	https://www.ncbi.nlm.nih.gov/geo/query/acc.cgi?acc=GSE125218	31819274	cycloheximide	GSM3566406; GSM3566407; GSM3566408; GSM3566409	Cells_HeLa-S3
Martinez_2019	HS	GSE125218	https://www.ncbi.nlm.nih.gov/geo/query/acc.cgi?acc=GSE125218	31819274	harringtonine	GSM3566416; GSM3566417	Cells_HeLa-S3
Martinez_2019	HS	GSE125218	https://www.ncbi.nlm.nih.gov/geo/query/acc.cgi?acc=GSE125218	31819274	lactimidomycin	GSM3566418; GSM3566419	Cells_HeLa-S3
Liu_2013	HS	SRA061778	https://www.ncbi.nlm.nih.gov/sra/?term=SRA061778	23290916	cycloheximide	SRX205675; SRX205673; SRX205672	Cells_HeLa-tTA
Huang_2019	HS	GSE110323	https://www.ncbi.nlm.nih.gov/geo/query/acc.cgi?acc=GSE110323	30867593	cycloheximide	GSM3450413; GSM3450414; GSM3450415; GSM3450416; GSM3450417; GSM3450418; GSM3450419; GSM3450420; GSM3450421; GSM3450422; GSM3450423; GSM3450424	Cells_HepG2
Xi_2019	HS	GSE122461	https://www.ncbi.nlm.nih.gov/geo/query/acc.cgi?acc=GSE122461	30640896	cycloheximide	GSM3466808; GSM3466809	Cells_HepG2
Werner_2015	HS	GSE62247	https://www.ncbi.nlm.nih.gov/geo/query/acc.cgi?acc=GSE62247	26399832	cycloheximide	GSM1523624; GSM1523625; GSM1523626; GSM1523627; GSM1523628; GSM1523629; GSM1523630; GSM1523631; GSM1523632; GSM1523633; GSM1523634; GSM1523635; GSM1523636; GSM1523637; GSM1523638; GSM1523639; GSM1782874; GSM1782875; GSM1782876; GSM1782877; GSM1782878; GSM1782879; GSM1782880	Cells_hES
Stern_2012	HS	GSE41605	https://www.ncbi.nlm.nih.gov/geo/query/acc.cgi?acc=GSE41605	23180859	cycloheximide	GSM1020234; GSM1020235; GSM1020236; GSM1020237	Cells_HFF
Stern_2012	HS	GSE41605	https://www.ncbi.nlm.nih.gov/geo/query/acc.cgi?acc=GSE41605	23180859	harringtonine	GSM1020238; GSM1020239	Cells_HFF
Stern_2012	HS	GSE41605	https://www.ncbi.nlm.nih.gov/geo/query/acc.cgi?acc=GSE41605	23180859	lactimidomycin	GSM1020240; GSM1020241	Cells_HFF
Stern_2012	HS	GSE41605	https://www.ncbi.nlm.nih.gov/geo/query/acc.cgi?acc=GSE41605	23180859	na	GSM1020242; GSM1020243	Cells_HFF
Rutkowski_2015	HS	GSE60040	https://www.ncbi.nlm.nih.gov/geo/query/acc.cgi?acc=GSE60040	25989971	cycloheximide	GSM1464095; GSM1464096; GSM1464097; GSM1464098; GSM1464099; GSM1464100; GSM1464101; GSM1464102; GSM1464103; GSM1464104; GSM1464105; GSM1464106	Cells_HFF
Tirosh_2015	HS	GSE69906	https://www.ncbi.nlm.nih.gov/geo/query/acc.cgi?acc=GSE69906	26599541	cycloheximide	GSM1712271; GSM1712272; GSM1712273; GSM1712274; GSM1712275; GSM1712276; GSM1712277	Cells_HFF
Holmes_2019	HS	GSE129869	https://www.ncbi.nlm.nih.gov/geo/query/acc.cgi?acc=GSE129869	31167946	cycloheximide	GSM3723750; GSM3723754; GSM3723755; GSM3723762; GSM3723763; GSM3723764; GSM3723765; GSM3723766; GSM3723767	Cells_HFF
Loayza-Puch_2016	HS	GSE59821	https://www.ncbi.nlm.nih.gov/geo/query/acc.cgi?acc=GSE59821	26878238	cycloheximide	GSM1712846; GSM1712850	Cells_Hs578t
Martinez_2019	HS	GSE125218	https://www.ncbi.nlm.nih.gov/geo/query/acc.cgi?acc=GSE125218	31819274	cycloheximide	GSM3566410; GSM3566411; GSM3566412	Cells_K562
Martinez_2019	HS	GSE125218	https://www.ncbi.nlm.nih.gov/geo/query/acc.cgi?acc=GSE125218	31819274	harringtonine	GSM3566420; GSM3566421	Cells_K562
Wolfe_2014	HS	GSE56887	https://www.ncbi.nlm.nih.gov/geo/query/acc.cgi?acc=GSE56887	25079319	cycloheximide	GSM1370695; GSM1370696; GSM1370697; GSM1370698	Cells_KOPT-K1
Cenik_2015	HS	GSE65912	https://www.ncbi.nlm.nih.gov/geo/query/acc.cgi?acc=GSE65912	26297486	cycloheximide	GSM1609377; GSM1609378; GSM1609379; GSM1609380; GSM1609381; GSM1609382; GSM1609383; GSM1609384; GSM1609385; GSM1609386; GSM1609387; GSM1609388; GSM1609389; GSM1609390; GSM1609391; GSM1609392; GSM1609393; GSM1609394; GSM1609395; GSM1609396; GSM1609397; GSM1609398; GSM1609399; GSM1609400; GSM1609401; GSM1609402; GSM1609403; GSM1609404; GSM1609405; GSM1609406; GSM1609407; GSM1609408; GSM1609409; GSM…	Cells_Lymphoblastoid
Raj_2016	HS	GSE75290	https://www.ncbi.nlm.nih.gov/geo/query/acc.cgi?acc=GSE75290	27232982	harringtonine	GSM1948925; GSM1948926	Cells_Lymphoblastoid
Reid_2015	HS	GSE68008	https://www.ncbi.nlm.nih.gov/geo/query/acc.cgi?acc=GSE68008	26164698	cycloheximide	GSM1660950; GSM1660951	Cells_Lymphocytes
Loayza-Puch_2016	HS	GSE59821	https://www.ncbi.nlm.nih.gov/geo/query/acc.cgi?acc=GSE59821	26878238	cycloheximide	GSM1446834; GSM1446838; GSM1922007	Cells_MCF10A
Loayza-Puch_2016	HS	GSE59821	https://www.ncbi.nlm.nih.gov/geo/query/acc.cgi?acc=GSE59821	26878238	cycloheximide	GSM1921994; GSM1921995; GSM1921996; GSM1712843; GSM1712847	Cells_MCF7
Rubio_2014	HS	GSE61375	https://www.ncbi.nlm.nih.gov/geo/query/acc.cgi?acc=GSE61375	25273840	cycloheximide	GSM1503433; GSM1503434; GSM1503435; GSM1503436; GSM1503437; GSM1503440; GSM1503441; GSM1503442; GSM1503443	Cells_MDA-MB-231
Loayza-Puch_2016	HS	GSE59821	https://www.ncbi.nlm.nih.gov/geo/query/acc.cgi?acc=GSE59821	26878238	cycloheximide	GSM1712845; GSM1712849	Cells_MDAMB231
Gao_2014	HS	SRA160745	https://www.ncbi.nlm.nih.gov/sra/?term=SRA160745	25486063	lactimidomycin	SRX739272; SRX739267	Cells_MEF
Wiita_2013	HS	GSE48785	https://www.ncbi.nlm.nih.gov/geo/query/acc.cgi?acc=GSE48785	24171104	cycloheximide	GSM1184592; GSM1184594; GSM1184596; GSM1184598; GSM1184600; GSM1184602	Cells_MM1S
Grow_2015	HS	GSE63570	https://www.ncbi.nlm.nih.gov/geo/query/acc.cgi?acc=GSE63570	25896322	cycloheximide	GSM1552807; GSM1552808	Cells_NCCIT
Loayza-Puch_2016	HS	GSE59821	https://www.ncbi.nlm.nih.gov/geo/query/acc.cgi?acc=GSE59821	26878238	cycloheximide	GSM1921989; GSM1921990; GSM1921991; GSM1921992; GSM1921993	Cells_PC3
Tanenbaum_2015	HS	GSE67902	https://www.ncbi.nlm.nih.gov/geo/query/acc.cgi?acc=GSE67902	26305499	cycloheximide	GSM1657720; GSM1657721; GSM1657722; GSM1657723; GSM1657724; GSM1657725	Cells_RPE1
Loayza-Puch_2016	HS	GSE59821	https://www.ncbi.nlm.nih.gov/geo/query/acc.cgi?acc=GSE59821	26878238	cycloheximide	GSM1446832; GSM1446833	Cells_SUM1315
Loayza-Puch_2016	HS	GSE59821	https://www.ncbi.nlm.nih.gov/geo/query/acc.cgi?acc=GSE59821	26878238	cycloheximide	GSM1921997; GSM1921998; GSM1921999; GSM1922000; GSM1922001; GSM1922002; GSM1922003; GSM1922004	Cells_SUM159PT
Loayza-Puch_2016	HS	GSE59821	https://www.ncbi.nlm.nih.gov/geo/query/acc.cgi?acc=GSE59821	26878238	cycloheximide	GSM1712844; GSM1712848	Cells_T47D
Fritsch_2012	HS	GSE39561	https://www.ncbi.nlm.nih.gov/geo/query/acc.cgi?acc=GSE39561	22879431	cycloheximide	GSM971688; GSM971689; GSM971690	Cells_THP1
Fritsch_2012	HS	GSE39561	https://www.ncbi.nlm.nih.gov/geo/query/acc.cgi?acc=GSE39561	22879431	puromycin	GSM971691; GSM971692; GSM971693	Cells_THP1
Choudhary_2020	HS	GSE141013	https://www.ncbi.nlm.nih.gov/geo/query/acc.cgi?acc=GSE141013	32488114	cycloheximide	GSM4192425; GSM4192426; GSM4192427; GSM4192428; GSM4192429; GSM4192430; GSM4192431; GSM4192432	Cells_U251
Guo_2014	HS	GSE51584	https://www.ncbi.nlm.nih.gov/geo/query/acc.cgi?acc=GSE51584	25070500	cycloheximide	GSM1248729; GSM1248732; GSM1248735	Cells_U2OS
Jang_2015	HS	GSE56924	https://www.ncbi.nlm.nih.gov/geo/query/acc.cgi?acc=GSE56924	26338483	cycloheximide	GSM1371443; GSM1371444; GSM1371445; GSM1371446; GSM1371447; GSM1371448; GSM1371449; GSM1371450; GSM1371451; GSM1371452; GSM1371453; GSM1371454; GSM1371455; GSM1371456; GSM1371457; GSM1371458; GSM1371459; GSM1371460; GSM1371461; GSM1371462; GSM1371463; GSM1371464; GSM1371465; GSM1371466; GSM1371467; GSM1371468; GSM1371469; GSM1371470; GSM1371471; GSM1371472; GSM1371473; GSM1371474; GSM1371475; GSM…	Cells_U2OS
Eichhorn_2014	HS	GSE60426	https://www.ncbi.nlm.nih.gov/geo/query/acc.cgi?acc=GSE60426	25263593	cycloheximide	GSM1479588; GSM1479592; GSM1479596	Cells_U2OS
Elkon_2015	HS	GSE66927	https://www.ncbi.nlm.nih.gov/geo/query/acc.cgi?acc=GSE66927	26538417	cycloheximide	GSM1634443; GSM1634444; GSM1634445; GSM1634446; GSM1634447; GSM1634448; GSM1634449; GSM1634450; GSM1634451; GSM1634452	Cells_U2OS
Choi_2019	HS	GSE121391	https://www.ncbi.nlm.nih.gov/geo/query/acc.cgi?acc=GSE121391	30819820	cycloheximide	GSM3434466; GSM3434468; GSM3434470; GSM3434472	Cells_U2OS
Liboy-Lugo JM	HS	GSE254634	https://www.ncbi.nlm.nih.gov/geo/query/acc.cgi?acc=GSE254634/	39356796	cycloheximide	GSM8047475; GSM8047476; GSM8047477; GSM8047478; GSM8047479; GSM8047480; GSM8047481; GSM8047482; GSM8047483; GSM8047485; GSM8047487;GSM8047489	Cells_U2OS
Choudhary_2020	HS	GSE141013	https://www.ncbi.nlm.nih.gov/geo/query/acc.cgi?acc=GSE141013	32488114	cycloheximide	GSM4192433; GSM4192434; GSM4192435; GSM4192436; GSM4192437; GSM4192438; GSM4192439; GSM4192440; GSM4192441	Cells_U343
Susanto T	HS	GSE274188	https://www.ncbi.nlm.nih.gov/geo/query/acc.cgi?acc=GSE274188	39260367	cycloheximide	GSM8444811; GSM8444810; GSM8444809; GSM8444808; GSM8444807; GSM8444806	Cells_hiNs
Mills_2016	HS	GSE85864	https://www.ncbi.nlm.nih.gov/geo/query/acc.cgi?acc=GSE85864	27681415	cycloheximide	GSM2285896; GSM2285897; GSM2285898; GSM2285899; GSM2285900; GSM2285901; GSM2285902; GSM2285903; GSM2285904; GSM2285905; GSM2285906; GSM2285907; GSM2285908; GSM2285909; GSM2285910; GSM2285911; GSM2285912; GSM2285913; GSM2285914; GSM2285915; GSM2285916; GSM2285917; GSM2285918; GSM2285919; GSM2285920; GSM2285921; GSM2285922; GSM2285923; GSM2285924; GSM2285925; GSM2285926; GSM2285927	Primary_Cells
Gonzalez_2014	HS	GSE51424	https://www.ncbi.nlm.nih.gov/geo/query/acc.cgi?acc=GSE51424	25122893	cycloheximide	GSM1495244; GSM1495245; GSM1495246; GSM1495247; GSM1495248	Tissue_Brain
Chothani SP	HS	GSE182377	https://www.ncbi.nlm.nih.gov/geo/query/acc.cgi?acc=GSE182377	35841888	cycloheximide	GSM5527677; GSM5527676; GSM5527675; GSM5527674; GSM5527673	Tissue_Brain
Basak_2020	HS	GSE131809	https://www.ncbi.nlm.nih.gov/geo/query/acc.cgi?acc=GSE131809	31959994	cycloheximide	GSM3820024; GSM3820025; GSM3820026; GSM3820027; GSM3820028; GSM3820029; GSM3820030; GSM3820031	Tissue_erythroids
Chothani SP	HS	GSE182377	https://www.ncbi.nlm.nih.gov/geo/query/acc.cgi?acc=GSE182377	35841888	cycloheximide	GSM5527683; GSM5527682; GSM5527681; GSM5527680; GSM5527679; GSM5527678	Tissue_ES
Chothani SP	HS	GSE182377	https://www.ncbi.nlm.nih.gov/geo/query/acc.cgi?acc=GSE182377	35841888	cycloheximide	GSM5527689; GSM5527688; GSM5527687; GSM5527686; GSM5527685; GSM5527684	Tissue_Fat
Chothani SP	HS	GSE182377	https://www.ncbi.nlm.nih.gov/geo/query/acc.cgi?acc=GSE182377	35841888	cycloheximide	GSM5527721; GSM5527720; GSM5527719; GSM5527718; GSM5527717; GSM5527716; GSM5527715; GSM5527714; GSM5527713; GSM5527712; GSM5527711; GSM5527710; GSM5527709; GSM5527708; GSM5527707; GSM5527706; GSM5527705; GSM5527704; GSM5527703; GSM5527702; GSM5527701; GSM5527700; GSM5527699; GSM5527698; GSM5527697; GSM5527696; GSM5527695; GSM5527694; GSM5527693; GSM5527692; GSM5527691; GSM5527690	Tissue_Fibroblast
Chothani SP	HS	GSE182377	https://www.ncbi.nlm.nih.gov/geo/query/acc.cgi?acc=GSE182377	35841888	cycloheximide	GSM5527727; GSM5527726; GSM5527725; GSM5527724; GSM5527723; GSM5527722	Cells_HAEC
Chothani SP	HS	GSE182377	https://www.ncbi.nlm.nih.gov/geo/query/acc.cgi?acc=GSE182377	35841888	cycloheximide	GSM5527732; GSM5527731; GSM5527730; GSM5527729; GSM5527728	Cells_HCAEC
Chothani_2019	HS	GSE131111	https://www.ncbi.nlm.nih.gov/geo/query/acc.cgi?acc=GSE131111	31284728	cycloheximide	GSM3763596; GSM3763597; GSM3763598; GSM3763599; GSM3763600; GSM3763601; GSM3763602; GSM3763603; GSM3763604; GSM3763605; GSM3763606; GSM3763607; GSM3763608; GSM3763609; GSM3763610; GSM3763611; GSM3763612; GSM3763613; GSM3763614; GSM3763615; GSM3763616; GSM3763617; GSM3763618; GSM3763619; GSM3763620; GSM3763621; GSM3763622; GSM3763623; GSM3763624; GSM3763625	Tissue_Heart
Loayza-Puch_2016	HS	GSE59821	https://www.ncbi.nlm.nih.gov/geo/query/acc.cgi?acc=GSE59821	26878238	cycloheximide	GSM1446874; GSM1446875; GSM1712831; GSM1712832; GSM1922046; GSM1922048	Tissue_Kidney
Loayza-Puch_2016	HS	GSE59821	https://www.ncbi.nlm.nih.gov/geo/query/acc.cgi?acc=GSE59821	26878238	cycloheximide	GSM1446876; GSM1446877; GSM1446878; GSM1446879; GSM1712833; GSM1712834; GSM1712835; GSM1712836; GSM1922047; GSM1922049	Tissue_KidneyTumor
Gao_2014	HS	SRA160745	https://www.ncbi.nlm.nih.gov/sra/?term=SRA160745	25486063	lactimidomycin	SRX738342; SRX738341	Tissue_Liver
Wein_2014	HS	GSE56148	https://www.ncbi.nlm.nih.gov/geo/query/acc.cgi?acc=GSE56148	25108525	cycloheximide	GSM1356674; GSM1356675	Tissue_Muscles
Chothani SP	HS	GSE182377	https://www.ncbi.nlm.nih.gov/geo/query/acc.cgi?acc=GSE182377	35841888	cycloheximide	GSM5527751; GSM5527750; GSM5527748; GSM5527747; GSM5527746; GSM5527745; GSM5527744; GSM5527743; GSM5527742; GSM5527741	Cells_VSMC
